# Supplementary material
Source: MDPI journal article supplement (https://www.mdpi.com/2073-445X/13/1/63)
Supplement: s1 [file s1]

|                                                                                                                                                                                                                                           |    |
|-------------------------------------------------------------------------------------------------------------------------------------------------------------------------------------------------------------------------------------------|----|
| LSA critical values for maize.....                                                                                                                                                                                                        | 2  |
| Current temperatures for May, June, July and August, over the study area .....                                                                                                                                                            | 3  |
| Climate projections from 10 GCMs (Table 2), under 2 RCPs & for four 30-year future periods: 2030s (2020–2049), 2050s (2040–2069), 2070s (2060–2089) and 2080s (2070–2099), for the climate variables of interest over the study area..... | 4  |
| 1. BCC.CSM1.1.M.....                                                                                                                                                                                                                      | 4  |
| 2. CESM1.CAM5.....                                                                                                                                                                                                                        | 6  |
| 3. CSIRO.ACCESS1.0 .....                                                                                                                                                                                                                  | 8  |
| 4. GFDL.CM3 .....                                                                                                                                                                                                                         | 10 |
| 5. GFDL.ESM2G .....                                                                                                                                                                                                                       | 12 |
| 6. GFDL.ESM2M.....                                                                                                                                                                                                                        | 14 |
| 7. MOHC.HADGEM2.CC .....                                                                                                                                                                                                                  | 16 |
| 8. MOHC.HADGEM2.ES .....                                                                                                                                                                                                                  | 18 |
| 9. MPI.ESM.LR.....                                                                                                                                                                                                                        | 20 |
| 10. NCAR.CCSM4 .....                                                                                                                                                                                                                      | 22 |

## LSA critical values for maize

### Input parameters threshold values for LSA

| FAO class                                                       |             |              | S1                     |     | S2         |      | S3   |       | N |  |
|-----------------------------------------------------------------|-------------|--------------|------------------------|-----|------------|------|------|-------|---|--|
| Score performance                                               |             |              | 100                    | 95  | 85         | 60   | 40   | <40   |   |  |
| Soil Properties                                                 |             | Code         | Units                  |     |            |      |      |       |   |  |
| Cation Exchange Capacity                                        | CEC         | cmol/kg      | >24                    | 24  | 16         | <12  | <8   | <6    |   |  |
| Soil organic carbon content (fine earth fraction)               | SOC         | g/kg         | >20                    | 20  | 12         | 8    | <4   | <2    |   |  |
| pH H <sub>2</sub> O                                             | PH          | pH (0-14)    | 6.6                    | 6.2 | 5.8        | 5.5  | 5.2  | <5,2  |   |  |
|                                                                 |             |              | 6.6                    | 7   | 7.8        | 8.2  | 8.5  | >8,5  |   |  |
| Texture class *                                                 | Texture     | USDA classes | SiC, SiCL, Si, SiL, CL |     | SC, L, SCL | SL   | LS   | C, S  |   |  |
| Volumetric % of coarse fragments                                | CRFVOL      | % vol.       | 0                      | 3   | 15         | 35   | 55   | >55   |   |  |
| Climatic properties                                             |             | Code         | Units                  |     |            |      |      |       |   |  |
| Precipitation of the growing cycle (May, June, July, August)    | PREC.GC     | mm           | 750                    | 900 | 1200       | 1400 | 1600 | >1600 |   |  |
|                                                                 |             |              | 750                    | 600 | 500        | 400  | 300  | <300  |   |  |
| Monthly rainfall May                                            | MAY.PREC    | mm           | 175                    | 220 | 295        | 400  | 475  | >475  |   |  |
|                                                                 |             |              | 175                    | 125 | 100        | 75   | 60   | <60   |   |  |
| Monthly rainfall June                                           | JUN.PREC    | mm           | 200                    | 235 | 310        | 400  | 475  | >475  |   |  |
|                                                                 |             |              | 200                    | 175 | 150        | 120  | 70   | <70   |   |  |
| Monthly rainfall July                                           | JUL.PREC    | mm           | 200                    | 235 | 310        | 400  | 475  | >475  |   |  |
|                                                                 |             |              | 200                    | 175 | 150        | 120  | 70   | <70   |   |  |
| Monthly rainfall August                                         | AUG.PREC    | mm           | 165                    | 210 | 285        | 400  | 475  | >475  |   |  |
|                                                                 |             |              | 165                    | 125 | 100        | 80   | 60   | <60   |   |  |
| Mean temperature of the growing cycle (May, June, July, August) | TEMP.AVG.GC | °C           | 24                     | 22  | 18         | 16   | 14   | <14   |   |  |
|                                                                 |             |              | 24                     | 26  | 32         | 35   | 40   | >40   |   |  |
| Mean min. temp. of the growing cycle (May, June, July, August)  | TEMP.MIN.GC | °C           | 17                     | 16  | 12         | 9    | 7    | <7    |   |  |
|                                                                 |             |              | 17                     | 18  | 24         | 28   | 30   | >30   |   |  |
| Topographic properties                                          |             | Code         | Units                  |     |            |      |      |       |   |  |
| Slope                                                           | slope       | %            | 0                      | 1   | 2          | 4    | 6    | >6    |   |  |

\* USDA classes: Clay (C), Silty Clay (SiC), Sandy Clay (SC), Clay Loam (CL), Silty Clay Loam (SiCL), Sandy Clay Loam (SCL), Loam (L), Silty Loam (SiL), Sandy Loam (SL), Silt (Si), Loamy Sand (LS), Sand (S)

## Current temperatures for May, June, July and August, over the study area

Monthly mean temperature statistics over the study area, during growing season (May-Aug), for current-LSA

### CAMPINE region

|                         | min  | max  | Mean | sd    |
|-------------------------|------|------|------|-------|
| May avg. temperature    | 12.8 | 14.1 | 13.2 | 0.21  |
| June avg. temperature   | 15.4 | 16.7 | 15.8 | 0.199 |
| July avg. temperature   | 17.5 | 18.7 | 17.9 | 0.221 |
| August avg. temperature | 17.4 | 18.6 | 17.9 | 0.242 |

### SANDY region

|                         | min  | max  | mean | sd    |
|-------------------------|------|------|------|-------|
| May avg. temperature    | 11.9 | 14   | 13.1 | 0.433 |
| June avg. temperature   | 14.6 | 16.7 | 15.7 | 0.396 |
| July avg. temperature   | 16.8 | 18.8 | 17.8 | 0.416 |
| August avg. temperature | 17.2 | 18.5 | 17.9 | 0.329 |

### SANDY LOAM region

|                         | min  | max  | mean | sd    |
|-------------------------|------|------|------|-------|
| May avg. temperature    | 11.7 | 14.2 | 13   | 0.479 |
| June avg. temperature   | 14.3 | 17   | 15.7 | 0.5   |
| July avg. temperature   | 16.5 | 19.1 | 17.8 | 0.478 |
| August avg. temperature | 17   | 18.8 | 17.8 | 0.344 |

Climate projections from 10 GCMs (Table 2), under 2 RCPs & for four 30-year future periods: 2030s (2020–2049), 2050s (2040–2069), 2070s (2060–2089) and 2080s (2070–2099), for the climate variables of interest over the study area.

## 1. BCC.CSM1.1.M

Statistics for BCC.CSM1.1.M climate projections over the study area

### RCP4.5 - 2030s -

|                    | <b>units</b> | <b>Min.</b> | <b>1st Qu.</b> | <b>Median</b> | <b>3rd Qu.</b> | <b>Max.</b> |
|--------------------|--------------|-------------|----------------|---------------|----------------|-------------|
| <i>MAY.PREC</i>    | mm           | 36          | 46             | 53            | 58             | 75.58       |
| <i>JUN.PREC</i>    | mm           | 40          | 56.92          | 64            | 67             | 81.77       |
| <i>JUL.PREC</i>    | mm           | 46          | 53             | 54            | 56             | 77.69       |
| <i>AUG.PREC</i>    | mm           | 54          | 63             | 65            | 67.54          | 89.5        |
| <i>PREC.GC</i>     | mm           | 187         | 222            | 233.3         | 247            | 324.5       |
| <i>TEMP.GC</i>     | °C           | 16.79       | 17.41          | 17.65         | 17.85          | 18.35       |
| <i>TEMP.MIN.GC</i> | °C           | 11.78       | 12.34          | 12.59         | 12.96          | 13.5        |

### RCP4.5 - 2050s -

|                    | <b>units</b> | <b>Min.</b> | <b>1st Qu.</b> | <b>Median</b> | <b>3rd Qu.</b> | <b>Max.</b> |
|--------------------|--------------|-------------|----------------|---------------|----------------|-------------|
| <i>MAY.PREC</i>    | mm           | 35          | 44             | 52            | 56.61          | 71.58       |
| <i>JUN.PREC</i>    | mm           | 38          | 56             | 64.05         | 69.4           | 84.77       |
| <i>JUL.PREC</i>    | mm           | 42          | 49             | 50.8          | 53             | 72.69       |
| <i>AUG.PREC</i>    | mm           | 54          | 62             | 64            | 66.54          | 85.5        |
| <i>PREC.GC</i>     | mm           | 180         | 216            | 229           | 242.2          | 314.5       |
| <i>TEMP.GC</i>     | °C           | 16.93       | 17.63          | 17.9          | 18.14          | 18.67       |
| <i>TEMP.MIN.GC</i> | °C           | 12          | 12.47          | 12.68         | 13.03          | 13.57       |

### RCP4.5 - 2070s -

|                    | <b>units</b> | <b>Min.</b> | <b>1st Qu.</b> | <b>Median</b> | <b>3rd Qu.</b> | <b>Max.</b> |
|--------------------|--------------|-------------|----------------|---------------|----------------|-------------|
| <i>MAY.PREC</i>    | mm           | 40          | 49             | 58.87         | 63.63          | 78.58       |
| <i>JUN.PREC</i>    | mm           | 36          | 52.01          | 61.99         | 67.73          | 83.77       |
| <i>JUL.PREC</i>    | mm           | 50          | 56.52          | 58            | 59             | 76.69       |
| <i>AUG.PREC</i>    | mm           | 51          | 59             | 61.26         | 64             | 83.5        |
| <i>PREC.GC</i>     | mm           | 188         | 223            | 236.4         | 250.5          | 322.5       |
| <i>TEMP.GC</i>     | °C           | 17.19       | 17.85          | 18.12         | 18.34          | 18.87       |
| <i>TEMP.MIN.GC</i> | °C           | 12.18       | 12.7           | 12.93         | 13.28          | 13.85       |

### RCP4.5 - 2080s -

|                    | <b>units</b> | <b>Min.</b> | <b>1st Qu.</b> | <b>Median</b> | <b>3rd Qu.</b> | <b>Max.</b> |
|--------------------|--------------|-------------|----------------|---------------|----------------|-------------|
| <i>MAY.PREC</i>    | mm           | 40          | 49.55          | 60            | 65.98          | 81.58       |
| <i>JUN.PREC</i>    | mm           | 33          | 49             | 59            | 65.08          | 81.77       |
| <i>JUL.PREC</i>    | mm           | 46.1        | 52.47          | 54            | 55             | 72.83       |
| <i>AUG.PREC</i>    | mm           | 54          | 62             | 64.83         | 67             | 85.5        |
| <i>PREC.GC</i>     | mm           | 183.1       | 219            | 234           | 249.6          | 321.5       |
| <i>TEMP.GC</i>     | °C           | 17.44       | 18.07          | 18.33         | 18.55          | 19.07       |
| <i>TEMP.MIN.GC</i> | °C           | 12.35       | 12.87          | 13.09         | 13.49          | 14.03       |

#### RCP8.5 - 2030s -

|                    | <b>units</b> | <b>Min.</b> | <b>1st Qu.</b> | <b>Median</b> | <b>3rd Qu.</b> | <b>Max.</b> |
|--------------------|--------------|-------------|----------------|---------------|----------------|-------------|
| <i>MAY.PREC</i>    | mm           | 38          | 47             | 53.59         | 58             | 74.58       |
| <i>JUN.PREC</i>    | mm           | 38          | 54             | 63            | 67.7           | 82.77       |
| <i>JUL.PREC</i>    | mm           | 39          | 45             | 46.43         | 49             | 71.69       |
| <i>AUG.PREC</i>    | mm           | 61          | 67.95          | 70            | 72             | 92.5        |
| <i>PREC.GC</i>     | mm           | 185.3       | 218.6          | 229.9         | 244            | 321.5       |
| <i>TEMP.GC</i>     | °C           | 16.83       | 17.37          | 17.6          | 17.79          | 18.3        |
| <i>TEMP.MIN.GC</i> | °C           | 11.68       | 12.24          | 12.5          | 12.9           | 13.48       |

#### RCP8.5 - 2050s -

|                    | <b>units</b> | <b>Min.</b> | <b>1st Qu.</b> | <b>Median</b> | <b>3rd Qu.</b> | <b>Max.</b> |
|--------------------|--------------|-------------|----------------|---------------|----------------|-------------|
| <i>MAY.PREC</i>    | mm           | 37          | 46             | 53.71         | 58.05          | 74.58       |
| <i>JUN.PREC</i>    | mm           | 31          | 46.99          | 55.22         | 60             | 74.77       |
| <i>JUL.PREC</i>    | mm           | 36          | 43             | 44            | 46             | 66.69       |
| <i>AUG.PREC</i>    | mm           | 50          | 57             | 59            | 61             | 81.5        |
| <i>PREC.GC</i>     | mm           | 164         | 197.8          | 209           | 222            | 297.5       |
| <i>TEMP.GC</i>     | °C           | 18.13       | 18.81          | 19.1          | 19.36          | 19.9        |
| <i>TEMP.MIN.GC</i> | °C           | 12.88       | 13.37          | 13.61         | 13.99          | 14.5        |

#### RCP8.5 - 2070s -

|                    | <b>units</b> | <b>Min.</b> | <b>1st Qu.</b> | <b>Median</b> | <b>3rd Qu.</b> | <b>Max.</b> |
|--------------------|--------------|-------------|----------------|---------------|----------------|-------------|
| <i>MAY.PREC</i>    | mm           | 38          | 47             | 54            | 56             | 67.58       |
| <i>JUN.PREC</i>    | mm           | 33          | 48             | 57            | 62             | 78.77       |
| <i>JUL.PREC</i>    | mm           | 32          | 38             | 39.19         | 41             | 60.69       |
| <i>AUG.PREC</i>    | mm           | 38          | 45             | 48            | 51             | 70.5        |
| <i>PREC.GC</i>     | mm           | 153         | 186.3          | 194           | 205.3          | 277.5       |
| <i>TEMP.GC</i>     | °C           | 18.95       | 19.82          | 20.2          | 20.52          | 21.1        |
| <i>TEMP.MIN.GC</i> | °C           | 13.85       | 14.35          | 14.54         | 14.81          | 15.27       |

#### RCP8.5 - 2080s -

|                    | <b>units</b> | <b>Min.</b> | <b>1st Qu.</b> | <b>Median</b> | <b>3rd Qu.</b> | <b>Max.</b> |
|--------------------|--------------|-------------|----------------|---------------|----------------|-------------|
| <i>MAY.PREC</i>    | mm           | 34.23       | 42             | 49.05         | 52             | 63.58       |
| <i>JUN.PREC</i>    | mm           | 30          | 45             | 52            | 56.14          | 72.77       |
| <i>JUL.PREC</i>    | mm           | 29          | 34.04          | 36            | 38             | 57.69       |
| <i>AUG.PREC</i>    | mm           | 39          | 46             | 49            | 52             | 73.5        |
| <i>PREC.GC</i>     | mm           | 144         | 174.3          | 181.3         | 194.2          | 267.5       |
| <i>TEMP.GC</i>     | °C           | 19.15       | 20.11          | 20.52         | 20.89          | 21.46       |
| <i>TEMP.MIN.GC</i> | °C           | 14.1        | 14.6           | 14.77         | 15             | 15.42       |

## 2. CESM1.CAM5

Statistics for CESM1.CAM5 climate projections over the study area

### RCP4.5 - 2030s -

|             | <b>units</b> | <b>Min.</b> | <b>1st Qu.</b> | <b>Median</b> | <b>3rd Qu.</b> | <b>Max.</b> |
|-------------|--------------|-------------|----------------|---------------|----------------|-------------|
| MAY.PREC    | mm           | 53          | 63             | 69            | 72             | 86.58       |
| JUN.PREC    | mm           | 51.21       | 62.02          | 68            | 72             | 91.77       |
| JUL.PREC    | mm           | 57          | 66             | 68            | 71             | 90.69       |
| AUG.PREC    | mm           | 44          | 52             | 55            | 58             | 77.5        |
| PREC.GC     | mm           | 217.1       | 247.5          | 258           | 271            | 346.5       |
| TEMP.GC     | °C           | 16.74       | 17.37          | 17.6          | 17.79          | 18.22       |
| TEMP.MIN.GC | °C           | 11.76       | 12.28          | 12.52         | 12.93          | 13.7        |

### RCP4.5 - 2050s -

|             | <b>units</b> | <b>Min.</b> | <b>1st Qu.</b> | <b>Median</b> | <b>3rd Qu.</b> | <b>Max.</b> |
|-------------|--------------|-------------|----------------|---------------|----------------|-------------|
| MAY.PREC    | mm           | 52          | 61             | 67            | 70             | 82.58       |
| JUN.PREC    | mm           | 44          | 59             | 67            | 72.76          | 91.77       |
| JUL.PREC    | mm           | 60          | 68.53          | 70.31         | 73             | 97.69       |
| AUG.PREC    | mm           | 57          | 63.97          | 66.21         | 69             | 88.5        |
| PREC.GC     | mm           | 224         | 257            | 268.4         | 282            | 360.5       |
| TEMP.GC     | °C           | 17.29       | 17.95          | 18.2          | 18.4           | 18.83       |
| TEMP.MIN.GC | °C           | 12.26       | 12.81          | 13.02         | 13.4           | 14.13       |

### RCP4.5 - 2070s -

|             | <b>units</b> | <b>Min.</b> | <b>1st Qu.</b> | <b>Median</b> | <b>3rd Qu.</b> | <b>Max.</b> |
|-------------|--------------|-------------|----------------|---------------|----------------|-------------|
| MAY.PREC    | mm           | 51          | 62.5           | 70.61         | 74             | 86.58       |
| JUN.PREC    | mm           | 50          | 63.5           | 69.75         | 73.11          | 89.77       |
| JUL.PREC    | mm           | 55          | 67             | 70            | 73.72          | 94.69       |
| AUG.PREC    | mm           | 30          | 38.99          | 41.54         | 45             | 67.5        |
| PREC.GC     | mm           | 198         | 234.9          | 249.4         | 264.7          | 338.5       |
| TEMP.GC     | °C           | 17.42       | 18.12          | 18.37         | 18.6           | 19.03       |
| TEMP.MIN.GC | °C           | 12.36       | 12.9           | 13.11         | 13.5           | 14.23       |

### RCP4.5 - 2080s -

|             | <b>units</b> | <b>Min.</b> | <b>1st Qu.</b> | <b>Median</b> | <b>3rd Qu.</b> | <b>Max.</b> |
|-------------|--------------|-------------|----------------|---------------|----------------|-------------|
| MAY.PREC    | mm           | 49          | 62             | 70.4          | 74.54          | 88.58       |
| JUN.PREC    | mm           | 44.02       | 58             | 64.81         | 69             | 87.77       |
| JUL.PREC    | mm           | 60          | 71.11          | 74            | 76.99          | 93.83       |
| AUG.PREC    | mm           | 29          | 37             | 40            | 43             | 63.5        |
| PREC.GC     | mm           | 195         | 233            | 246.4         | 260            | 333.5       |
| TEMP.GC     | °C           | 17.6        | 18.24          | 18.5          | 18.75          | 19.18       |
| TEMP.MIN.GC | °C           | 12.46       | 13             | 13.22         | 13.6           | 14.33       |

### RCP8.5 - 2030s -

|          | <b>units</b> | <b>Min.</b> | <b>1st Qu.</b> | <b>Median</b> | <b>3rd Qu.</b> | <b>Max.</b> |
|----------|--------------|-------------|----------------|---------------|----------------|-------------|
| MAY.PREC | mm           | 57          | 69.02          | 78            | 82             | 92.88       |
| JUN.PREC | mm           | 55          | 69.07          | 76            | 80.86          | 101.8       |
| JUL.PREC | mm           | 59          | 70             | 72            | 75             | 93.69       |
| AUG.PREC | mm           | 53          | 62             | 65            | 68             | 90.5        |

|                    |    |       |       |       |       |       |
|--------------------|----|-------|-------|-------|-------|-------|
| <i>PREC.GC</i>     | mm | 238   | 274.3 | 289   | 304.2 | 378.5 |
| <i>TEMP.GC</i>     | °C | 16.71 | 17.63 | 17.87 | 18.1  | 18.53 |
| <i>TEMP.MIN.GC</i> | °C | 11.21 | 12.52 | 12.85 | 13.24 | 14    |

#### RCP8.5 - 2050s -

|                    | <b>units</b> | <b>Min.</b> | <b>1st Qu.</b> | <b>Median</b> | <b>3rd Qu.</b> | <b>Max.</b> |
|--------------------|--------------|-------------|----------------|---------------|----------------|-------------|
| <i>MAY.PREC</i>    | mm           | 52          | 63.16          | 71            | 74             | 84.88       |
| <i>JUN.PREC</i>    | mm           | 44          | 58             | 65            | 69.88          | 90.77       |
| <i>JUL.PREC</i>    | mm           | 52          | 65             | 69            | 73.6           | 92.69       |
| <i>AUG.PREC</i>    | mm           | 49.22       | 56.43          | 59.2          | 62             | 82.5        |
| <i>PREC.GC</i>     | mm           | 208.4       | 247.7          | 261.8         | 276.5          | 350.5       |
| <i>TEMP.GC</i>     | °C           | 17.94       | 18.8           | 19.04         | 19.27          | 19.72       |
| <i>TEMP.MIN.GC</i> | °C           | 12.06       | 13.47          | 13.78         | 14.15          | 14.93       |

#### RCP8.5 - 2070s -

|                    | <b>units</b> | <b>Min.</b> | <b>1st Qu.</b> | <b>Median</b> | <b>3rd Qu.</b> | <b>Max.</b> |
|--------------------|--------------|-------------|----------------|---------------|----------------|-------------|
| <i>MAY.PREC</i>    | mm           | 42.11       | 52             | 61.14         | 65             | 76.58       |
| <i>JUN.PREC</i>    | mm           | 38          | 52             | 58            | 62.15          | 80.77       |
| <i>JUL.PREC</i>    | mm           | 48          | 58             | 60            | 63             | 80.69       |
| <i>AUG.PREC</i>    | mm           | 33          | 42.11          | 45            | 47.91          | 70.5        |
| <i>PREC.GC</i>     | mm           | 170         | 209            | 222.3         | 237            | 308.5       |
| <i>TEMP.GC</i>     | °C           | 19.18       | 19.93          | 20.27         | 20.56          | 21.06       |
| <i>TEMP.MIN.GC</i> | °C           | 13.08       | 14.4           | 14.65         | 14.98          | 15.72       |

#### RCP8.5 - 2080s -

|                    | <b>units</b> | <b>Min.</b> | <b>1st Qu.</b> | <b>Median</b> | <b>3rd Qu.</b> | <b>Max.</b> |
|--------------------|--------------|-------------|----------------|---------------|----------------|-------------|
| <i>MAY.PREC</i>    | mm           | 42          | 52             | 61            | 64             | 74.58       |
| <i>JUN.PREC</i>    | mm           | 41          | 56             | 63.46         | 68             | 86.77       |
| <i>JUL.PREC</i>    | mm           | 43          | 53             | 55            | 58             | 77.69       |
| <i>AUG.PREC</i>    | mm           | 34          | 43.41          | 46.07         | 49             | 71.5        |
| <i>PREC.GC</i>     | mm           | 169         | 210            | 222.9         | 236.8          | 310.5       |
| <i>TEMP.GC</i>     | °C           | 19.17       | 20.05          | 20.45         | 20.77          | 21.29       |
| <i>TEMP.MIN.GC</i> | °C           | 13.31       | 14.57          | 14.8          | 15.1           | 15.7        |

### 3. CSIRO.ACCESS1.0

Statistics for CSIRO.ACCESS1.0 climate projections over the study area

#### RCP4.5 - 2030s -

|             | <b>units</b> | <b>Min.</b> | <b>1st Qu.</b> | <b>Median</b> | <b>3rd Qu.</b> | <b>Max.</b> |
|-------------|--------------|-------------|----------------|---------------|----------------|-------------|
| MAY.PREC    | mm           | 47          | 54.11          | 61            | 65             | 77.58       |
| JUN.PREC    | mm           | 54          | 69             | 76            | 81             | 99.77       |
| JUL.PREC    | mm           | 48          | 52             | 53.43         | 55             | 70.69       |
| AUG.PREC    | mm           | 28          | 35.13          | 38.6          | 42             | 58.5        |
| PREC.GC     | mm           | 198.2       | 221.1          | 224.9         | 234            | 306.5       |
| TEMP.GC     | °C           | 16.9        | 17.68          | 18.02         | 18.3           | 18.72       |
| TEMP.MIN.GC | °C           | 12.11       | 12.6           | 12.74         | 12.95          | 13.45       |

#### RCP4.5 - 2050s -

|             | <b>units</b> | <b>Min.</b> | <b>1st Qu.</b> | <b>Median</b> | <b>3rd Qu.</b> | <b>Max.</b> |
|-------------|--------------|-------------|----------------|---------------|----------------|-------------|
| MAY.PREC    | mm           | 43          | 52             | 59.38         | 63.82          | 79.58       |
| JUN.PREC    | mm           | 56          | 73.06          | 79.7          | 84             | 99.77       |
| JUL.PREC    | mm           | 48          | 53.03          | 54.89         | 56             | 75.69       |
| AUG.PREC    | mm           | 35          | 42             | 44.23         | 47             | 66.5        |
| PREC.GC     | mm           | 200         | 228            | 234           | 245            | 321.5       |
| TEMP.GC     | °C           | 17.43       | 18.25          | 18.6          | 18.87          | 19.3        |
| TEMP.MIN.GC | °C           | 12.79       | 13.27          | 13.4          | 13.6           | 14.1        |

#### RCP4.5 - 2070s -

|             | <b>units</b> | <b>Min.</b> | <b>1st Qu.</b> | <b>Median</b> | <b>3rd Qu.</b> | <b>Max.</b> |
|-------------|--------------|-------------|----------------|---------------|----------------|-------------|
| MAY.PREC    | mm           | 46          | 56             | 67            | 74             | 93.58       |
| JUN.PREC    | mm           | 55          | 71             | 76            | 79.04          | 93.77       |
| JUL.PREC    | mm           | 43          | 47             | 48.99         | 50.14          | 68.69       |
| AUG.PREC    | mm           | 32          | 40             | 42            | 45             | 61.5        |
| PREC.GC     | mm           | 196         | 225            | 230           | 239.7          | 317.5       |
| TEMP.GC     | °C           | 17.77       | 18.5           | 18.8          | 19.05          | 19.52       |
| TEMP.MIN.GC | °C           | 12.98       | 13.46          | 13.6          | 13.85          | 14.35       |

#### RCP4.5 - 2080s -

|             | <b>units</b> | <b>Min.</b> | <b>1st Qu.</b> | <b>Median</b> | <b>3rd Qu.</b> | <b>Max.</b> |
|-------------|--------------|-------------|----------------|---------------|----------------|-------------|
| MAY.PREC    | mm           | 44          | 54.27          | 64            | 71             | 89.58       |
| JUN.PREC    | mm           | 52          | 68             | 73            | 76.2           | 91.77       |
| JUL.PREC    | mm           | 45          | 49             | 50.58         | 52.09          | 67.69       |
| AUG.PREC    | mm           | 34          | 42             | 44.08         | 47             | 64.5        |
| PREC.GC     | mm           | 193         | 224            | 229           | 237.9          | 313.5       |
| TEMP.GC     | °C           | 17.82       | 18.59          | 18.94         | 19.23          | 19.67       |
| TEMP.MIN.GC | °C           | 13.11       | 13.6           | 13.73         | 13.93          | 14.43       |

#### RCP8.5 - 2030s -

|          | <b>units</b> | <b>Min.</b> | <b>1st Qu.</b> | <b>Median</b> | <b>3rd Qu.</b> | <b>Max.</b> |
|----------|--------------|-------------|----------------|---------------|----------------|-------------|
| MAY.PREC | mm           | 41          | 52             | 62            | 70.4           | 92.58       |
| JUN.PREC | mm           | 47          | 64             | 73            | 77.84          | 94.77       |
| JUL.PREC | mm           | 53          | 58.03          | 59.69         | 61             | 82.69       |
| AUG.PREC | mm           | 39          | 47             | 49            | 52             | 69.5        |



|                    |    |       |       |       |       |       |
|--------------------|----|-------|-------|-------|-------|-------|
| <i>PREC.GC</i>     | mm | 198   | 229   | 239.1 | 254.2 | 339.5 |
| <i>TEMP.GC</i>     | °C | 17.16 | 17.94 | 18.27 | 18.52 | 18.95 |
| <i>TEMP.MIN.GC</i> | °C | 12.58 | 13.07 | 13.2  | 13.4  | 13.87 |

#### RCP8.5 - 2050s -

|                    | <b>units</b> | <b>Min.</b> | <b>1st Qu.</b> | <b>Median</b> | <b>3rd Qu.</b> | <b>Max.</b> |
|--------------------|--------------|-------------|----------------|---------------|----------------|-------------|
| <i>MAY.PREC</i>    | mm           | 43          | 54             | 64            | 71.97          | 92.58       |
| <i>JUN.PREC</i>    | mm           | 46          | 63             | 70            | 74             | 90.77       |
| <i>JUL.PREC</i>    | mm           | 44          | 47.25          | 50            | 52             | 63.69       |
| <i>AUG.PREC</i>    | mm           | 28          | 36             | 39            | 42.93          | 58.5        |
| <i>PREC.GC</i>     | mm           | 186         | 215            | 219           | 228            | 305.5       |
| <i>TEMP.GC</i>     | °C           | 18.15       | 19.01          | 19.42         | 19.73          | 20.18       |
| <i>TEMP.MIN.GC</i> | °C           | 13.46       | 13.94          | 14.07         | 14.24          | 14.7        |

#### RCP8.5 - 2070s -

|                    | <b>units</b> | <b>Min.</b> | <b>1st Qu.</b> | <b>Median</b> | <b>3rd Qu.</b> | <b>Max.</b> |
|--------------------|--------------|-------------|----------------|---------------|----------------|-------------|
| <i>MAY.PREC</i>    | mm           | 47          | 57             | 66            | 71.46          | 87.58       |
| <i>JUN.PREC</i>    | mm           | 46          | 60             | 67            | 72             | 87.77       |
| <i>JUL.PREC</i>    | mm           | 36          | 40             | 42.14         | 45             | 59.69       |
| <i>AUG.PREC</i>    | mm           | 18          | 26.3           | 29.55         | 32.97          | 48.6        |
| <i>PREC.GC</i>     | mm           | 173         | 197            | 200           | 208.8          | 283.6       |
| <i>TEMP.GC</i>     | °C           | 19.15       | 20.23          | 20.77         | 21.19          | 21.8        |
| <i>TEMP.MIN.GC</i> | °C           | 14.47       | 14.99          | 15.12         | 15.24          | 15.78       |

#### RCP8.5 - 2080s -

|                    | <b>units</b> | <b>Min.</b> | <b>1st Qu.</b> | <b>Median</b> | <b>3rd Qu.</b> | <b>Max.</b> |
|--------------------|--------------|-------------|----------------|---------------|----------------|-------------|
| <i>MAY.PREC</i>    | mm           | 42          | 50             | 57.3          | 62             | 76.58       |
| <i>JUN.PREC</i>    | mm           | 46          | 59             | 65            | 69             | 84.77       |
| <i>JUL.PREC</i>    | mm           | 39          | 43             | 45            | 48             | 60.69       |
| <i>AUG.PREC</i>    | mm           | 19          | 27.34          | 30            | 33             | 48.5        |
| <i>PREC.GC</i>     | mm           | 172         | 191            | 195           | 200.5          | 270.5       |
| <i>TEMP.GC</i>     | °C           | 19.7        | 20.84          | 21.43         | 21.88          | 22.58       |
| <i>TEMP.MIN.GC</i> | °C           | 15.01       | 15.57          | 15.69         | 15.81          | 16.45       |

#### 4. GFDL.CM3

##### Statistics for GFDL.CM3 climate projections over the study area

###### RCP4.5 - 2030s -

|                    | <b>units</b> | <b>Min.</b> | <b>1st Qu.</b> | <b>Median</b> | <b>3rd Qu.</b> | <b>Max.</b> |
|--------------------|--------------|-------------|----------------|---------------|----------------|-------------|
| <i>MAY.PREC</i>    | mm           | 58          | 69             | 76.02         | 79             | 91.58       |
| <i>JUN.PREC</i>    | mm           | 51          | 68             | 76.65         | 82             | 98.77       |
| <i>JUL.PREC</i>    | mm           | 41.46       | 50.95          | 53            | 56.11          | 76.69       |
| <i>AUG.PREC</i>    | mm           | 44.59       | 52.98          | 55.15         | 57.34          | 77.5        |
| <i>PREC.GC</i>     | mm           | 206.4       | 245            | 259           | 272.4          | 344.5       |
| <i>TEMP.GC</i>     | °C           | 17.79       | 18.41          | 18.64         | 18.85          | 19.27       |
| <i>TEMP.MIN.GC</i> | °C           | 12.89       | 13.44          | 13.57         | 13.8           | 14.3        |

###### RCP4.5 - 2050s -

|                    | <b>units</b> | <b>Min.</b> | <b>1st Qu.</b> | <b>Median</b> | <b>3rd Qu.</b> | <b>Max.</b> |
|--------------------|--------------|-------------|----------------|---------------|----------------|-------------|
| <i>MAY.PREC</i>    | mm           | 52          | 63             | 73            | 78             | 91.58       |
| <i>JUN.PREC</i>    | mm           | 45          | 62             | 70            | 75.64          | 92.77       |
| <i>JUL.PREC</i>    | mm           | 39          | 48             | 50            | 53.11          | 73.69       |
| <i>AUG.PREC</i>    | mm           | 42          | 50.01          | 53            | 55             | 72.5        |
| <i>PREC.GC</i>     | mm           | 190         | 228            | 243.2         | 258            | 330.5       |
| <i>TEMP.GC</i>     | °C           | 18.7        | 19.31          | 19.56         | 19.79          | 20.25       |
| <i>TEMP.MIN.GC</i> | °C           | 13.68       | 14.22          | 14.34         | 14.55          | 15.05       |

###### RCP4.5 - 2070s -

|                    | <b>units</b> | <b>Min.</b> | <b>1st Qu.</b> | <b>Median</b> | <b>3rd Qu.</b> | <b>Max.</b> |
|--------------------|--------------|-------------|----------------|---------------|----------------|-------------|
| <i>MAY.PREC</i>    | mm           | 57.1        | 69             | 76.05         | 80             | 94.58       |
| <i>JUN.PREC</i>    | mm           | 35          | 51             | 59.43         | 65.5           | 83.77       |
| <i>JUL.PREC</i>    | mm           | 31          | 39.82          | 41.08         | 43             | 61.69       |
| <i>AUG.PREC</i>    | mm           | 39          | 46             | 48.59         | 51             | 70.5        |
| <i>PREC.GC</i>     | mm           | 173         | 210.1          | 223.8         | 236.3          | 310.5       |
| <i>TEMP.GC</i>     | °C           | 19.22       | 19.9           | 20.19         | 20.44          | 20.83       |
| <i>TEMP.MIN.GC</i> | °C           | 14.15       | 14.78          | 14.9          | 15.05          | 15.52       |

###### RCP4.5 - 2080s -

|                    | <b>units</b> | <b>Min.</b> | <b>1st Qu.</b> | <b>Median</b> | <b>3rd Qu.</b> | <b>Max.</b> |
|--------------------|--------------|-------------|----------------|---------------|----------------|-------------|
| <i>MAY.PREC</i>    | mm           | 61          | 72             | 79            | 83             | 97.58       |
| <i>JUN.PREC</i>    | mm           | 40          | 57             | 65.98         | 71.67          | 89.77       |
| <i>JUL.PREC</i>    | mm           | 34          | 43             | 45.02         | 48             | 66.69       |
| <i>AUG.PREC</i>    | mm           | 40          | 47             | 49.34         | 52             | 71.5        |
| <i>PREC.GC</i>     | mm           | 187         | 223            | 237.1         | 250.8          | 325.5       |
| <i>TEMP.GC</i>     | °C           | 19.05       | 19.73          | 20.01         | 20.25          | 20.7        |
| <i>TEMP.MIN.GC</i> | °C           | 14.1        | 14.69          | 14.81         | 14.97          | 15.47       |

###### RCP8.5 - 2030s -

|                 | <b>units</b> | <b>Min.</b> | <b>1st Qu.</b> | <b>Median</b> | <b>3rd Qu.</b> | <b>Max.</b> |
|-----------------|--------------|-------------|----------------|---------------|----------------|-------------|
| <i>MAY.PREC</i> | mm           | 49          | 60             | 67.85         | 71             | 83.58       |
| <i>JUN.PREC</i> | mm           | 48          | 65             | 71.16         | 75.13          | 90.77       |
| <i>JUL.PREC</i> | mm           | 46          | 55.93          | 57.85         | 60.44          | 81.69       |
| <i>AUG.PREC</i> | mm           | 48          | 55             | 57.68         | 60             | 80.5        |

|                    |    |       |       |      |       |       |
|--------------------|----|-------|-------|------|-------|-------|
| <i>PREC.GC</i>     | mm | 200.3 | 240   | 252  | 264   | 336.5 |
| <i>TEMP.GC</i>     | °C | 17.96 | 18.64 | 18.9 | 19.12 | 19.53 |
| <i>TEMP.MIN.GC</i> | °C | 13.02 | 13.59 | 13.7 | 13.91 | 14.42 |

#### RCP8.5 - 2050s -

|                    | <b>units</b> | <b>Min.</b> | <b>1st Qu.</b> | <b>Median</b> | <b>3rd Qu.</b> | <b>Max.</b> |
|--------------------|--------------|-------------|----------------|---------------|----------------|-------------|
| <i>MAY.PREC</i>    | mm           | 56          | 66             | 72.55         | 76             | 88.58       |
| <i>JUN.PREC</i>    | mm           | 40          | 55             | 62            | 66.05          | 82.77       |
| <i>JUL.PREC</i>    | mm           | 31          | 39             | 40.32         | 42.88          | 60.69       |
| <i>AUG.PREC</i>    | mm           | 43          | 50             | 52.02         | 54.97          | 70.48       |
| <i>PREC.GC</i>     | mm           | 184         | 216            | 225           | 235            | 302.5       |
| <i>TEMP.GC</i>     | °C           | 19.48       | 20.17          | 20.46         | 20.72          | 21.14       |
| <i>TEMP.MIN.GC</i> | °C           | 14.47       | 15.01          | 15.13         | 15.3           | 15.77       |

#### RCP8.5 - 2070s -

|                    | <b>units</b> | <b>Min.</b> | <b>1st Qu.</b> | <b>Median</b> | <b>3rd Qu.</b> | <b>Max.</b> |
|--------------------|--------------|-------------|----------------|---------------|----------------|-------------|
| <i>MAY.PREC</i>    | mm           | 58          | 68             | 75.97         | 79             | 92.58       |
| <i>JUN.PREC</i>    | mm           | 31          | 47.12          | 55            | 60.1           | 76.77       |
| <i>JUL.PREC</i>    | mm           | 24.76       | 35             | 37            | 41             | 58.69       |
| <i>AUG.PREC</i>    | mm           | 39          | 46.2           | 49            | 51             | 66.5        |
| <i>PREC.GC</i>     | mm           | 166.8       | 203            | 214           | 226.9          | 294.5       |
| <i>TEMP.GC</i>     | °C           | 21.02       | 21.72          | 22            | 22.28          | 22.8        |
| <i>TEMP.MIN.GC</i> | °C           | 15.97       | 16.42          | 16.55         | 16.73          | 17.2        |

#### RCP8.5 - 2080s -

|                    | <b>units</b> | <b>Min.</b> | <b>1st Qu.</b> | <b>Median</b> | <b>3rd Qu.</b> | <b>Max.</b> |
|--------------------|--------------|-------------|----------------|---------------|----------------|-------------|
| <i>MAY.PREC</i>    | mm           | 56          | 66             | 72.19         | 75             | 87.58       |
| <i>JUN.PREC</i>    | mm           | 33          | 49.91          | 58.47         | 64.57          | 82.77       |
| <i>JUL.PREC</i>    | mm           | 24          | 33             | 35            | 38.23          | 55.69       |
| <i>AUG.PREC</i>    | mm           | 31          | 38             | 40            | 42.87          | 59.66       |
| <i>PREC.GC</i>     | mm           | 157         | 192            | 203.4         | 216            | 285.5       |
| <i>TEMP.GC</i>     | °C           | 21.76       | 22.5           | 22.81         | 23.12          | 23.6        |
| <i>TEMP.MIN.GC</i> | °C           | 16.67       | 17.17          | 17.3          | 17.45          | 17.87       |

## 5. GFDL.ESM2G

### Statistics for GFDL.ESM2G climate projections over the study area

#### RCP4.5 - 2030s -

|             | <b>units</b> | <b>Min.</b> | <b>1st Qu.</b> | <b>Median</b> | <b>3rd Qu.</b> | <b>Max.</b> |
|-------------|--------------|-------------|----------------|---------------|----------------|-------------|
| MAY.PREC    | mm           | 46          | 55             | 62            | 65.81          | 79.58       |
| JUN.PREC    | mm           | 40.11       | 55             | 63            | 68.72          | 84.77       |
| JUL.PREC    | mm           | 61          | 71             | 74            | 78.97          | 100.7       |
| AUG.PREC    | mm           | 53          | 59.64          | 62            | 64.52          | 84.5        |
| PREC.GC     | mm           | 212.1       | 245            | 258.6         | 274.9          | 349.5       |
| TEMP.GC     | °C           | 15.96       | 16.58          | 16.8          | 16.98          | 17.45       |
| TEMP.MIN.GC | °C           | 11.2        | 11.85          | 12.1          | 12.44          | 13.03       |

#### RCP4.5 - 2050s -

|             | <b>units</b> | <b>Min.</b> | <b>1st Qu.</b> | <b>Median</b> | <b>3rd Qu.</b> | <b>Max.</b> |
|-------------|--------------|-------------|----------------|---------------|----------------|-------------|
| MAY.PREC    | mm           | 45          | 55             | 62.83         | 66.81          | 81.58       |
| JUN.PREC    | mm           | 36          | 50             | 58            | 64             | 79.77       |
| JUL.PREC    | mm           | 56          | 64.54          | 67            | 71             | 93.69       |
| AUG.PREC    | mm           | 54          | 61             | 63            | 66             | 83.5        |
| PREC.GC     | mm           | 205         | 236            | 248.3         | 263.5          | 338.5       |
| TEMP.GC     | °C           | 16.24       | 16.85          | 17.07         | 17.26          | 17.72       |
| TEMP.MIN.GC | °C           | 11.53       | 12.14          | 12.33         | 12.64          | 13.23       |

#### RCP4.5 - 2070s -

|             | <b>units</b> | <b>Min.</b> | <b>1st Qu.</b> | <b>Median</b> | <b>3rd Qu.</b> | <b>Max.</b> |
|-------------|--------------|-------------|----------------|---------------|----------------|-------------|
| MAY.PREC    | mm           | 43          | 53.6           | 63            | 67             | 80.58       |
| JUN.PREC    | mm           | 39          | 54             | 62            | 68             | 85.39       |
| JUL.PREC    | mm           | 59          | 70             | 73.77         | 78.45          | 102.7       |
| AUG.PREC    | mm           | 49          | 55.66          | 58            | 61             | 80.5        |
| PREC.GC     | mm           | 201         | 238            | 254           | 271            | 348.7       |
| TEMP.GC     | °C           | 16.24       | 16.85          | 17.07         | 17.25          | 17.75       |
| TEMP.MIN.GC | °C           | 11.53       | 12.13          | 12.35         | 12.66          | 13.2        |

#### RCP4.5 - 2080s -

|             | <b>units</b> | <b>Min.</b> | <b>1st Qu.</b> | <b>Median</b> | <b>3rd Qu.</b> | <b>Max.</b> |
|-------------|--------------|-------------|----------------|---------------|----------------|-------------|
| MAY.PREC    | mm           | 36.2        | 46             | 55            | 59             | 72.58       |
| JUN.PREC    | mm           | 40          | 55             | 64            | 70             | 88.77       |
| JUL.PREC    | mm           | 59          | 69.36          | 73            | 78.94          | 101.7       |
| AUG.PREC    | mm           | 43          | 50.04          | 53            | 55.08          | 73.5        |
| PREC.GC     | mm           | 192         | 227            | 242           | 259.4          | 336.5       |
| TEMP.GC     | °C           | 16.1        | 16.71          | 16.93         | 17.11          | 17.57       |
| TEMP.MIN.GC | °C           | 11.33       | 11.97          | 12.21         | 12.54          | 13.1        |

#### RCP8.5 - 2030s -

|          | <b>units</b> | <b>Min.</b> | <b>1st Qu.</b> | <b>Median</b> | <b>3rd Qu.</b> | <b>Max.</b> |
|----------|--------------|-------------|----------------|---------------|----------------|-------------|
| MAY.PREC | mm           | 36          | 44             | 51.35         | 57             | 72.58       |
| JUN.PREC | mm           | 42          | 58.19          | 68            | 74.62          | 91.77       |
| JUL.PREC | mm           | 56          | 65             | 67.74         | 72             | 94.69       |
| AUG.PREC | mm           | 39          | 45.82          | 48            | 50.7           | 67.5        |

|                    |    |       |       |       |       |       |
|--------------------|----|-------|-------|-------|-------|-------|
| <i>PREC.GC</i>     | mm | 186   | 218   | 232   | 249.3 | 326.5 |
| <i>TEMP.GC</i>     | °C | 16.19 | 16.78 | 16.99 | 17.18 | 17.64 |
| <i>TEMP.MIN.GC</i> | °C | 11.3  | 11.97 | 12.22 | 12.55 | 13.12 |

#### RCP8.5 - 2050s -

|                    | <b>units</b> | <b>Min.</b> | <b>1st Qu.</b> | <b>Median</b> | <b>3rd Qu.</b> | <b>Max.</b> |
|--------------------|--------------|-------------|----------------|---------------|----------------|-------------|
| <i>MAY.PREC</i>    | mm           | 39          | 48             | 57            | 62.03          | 77.58       |
| <i>JUN.PREC</i>    | mm           | 28          | 44             | 54.96         | 62             | 79.77       |
| <i>JUL.PREC</i>    | mm           | 50          | 58             | 60            | 63.84          | 83.69       |
| <i>AUG.PREC</i>    | mm           | 39          | 46             | 48            | 50.95          | 66.5        |
| <i>PREC.GC</i>     | mm           | 171         | 203            | 216.8         | 233.6          | 307.5       |
| <i>TEMP.GC</i>     | °C           | 16.96       | 17.57          | 17.78         | 17.97          | 18.45       |
| <i>TEMP.MIN.GC</i> | °C           | 12.1        | 12.71          | 12.95         | 13.28          | 13.83       |

#### RCP8.5 - 2070s -

|                    | <b>units</b> | <b>Min.</b> | <b>1st Qu.</b> | <b>Median</b> | <b>3rd Qu.</b> | <b>Max.</b> |
|--------------------|--------------|-------------|----------------|---------------|----------------|-------------|
| <i>MAY.PREC</i>    | mm           | 39          | 48.08          | 58            | 62             | 75.58       |
| <i>JUN.PREC</i>    | mm           | 17          | 31             | 40.91         | 48             | 65.77       |
| <i>JUL.PREC</i>    | mm           | 37.1        | 46             | 48            | 52             | 69.69       |
| <i>AUG.PREC</i>    | mm           | 31          | 38.72          | 40.98         | 43             | 58.5        |
| <i>PREC.GC</i>     | mm           | 137.1       | 171            | 183.8         | 200.3          | 269.5       |
| <i>TEMP.GC</i>     | °C           | 17.42       | 18.04          | 18.26         | 18.47          | 18.95       |
| <i>TEMP.MIN.GC</i> | °C           | 12.55       | 13.13          | 13.35         | 13.65          | 14.18       |

#### RCP8.5 - 2080s -

|                    | <b>units</b> | <b>Min.</b> | <b>1st Qu.</b> | <b>Median</b> | <b>3rd Qu.</b> | <b>Max.</b> |
|--------------------|--------------|-------------|----------------|---------------|----------------|-------------|
| <i>MAY.PREC</i>    | mm           | 39          | 48             | 57.91         | 61.95          | 74.5        |
| <i>JUN.PREC</i>    | mm           | 24          | 38             | 47            | 53             | 68.77       |
| <i>JUL.PREC</i>    | mm           | 35          | 44             | 47            | 51             | 71.69       |
| <i>AUG.PREC</i>    | mm           | 30          | 37.76          | 40            | 42             | 57.5        |
| <i>PREC.GC</i>     | mm           | 140         | 175            | 187.6         | 203.7          | 272.4       |
| <i>TEMP.GC</i>     | °C           | 17.82       | 18.47          | 18.71         | 18.95          | 19.4        |
| <i>TEMP.MIN.GC</i> | °C           | 13.03       | 13.58          | 13.77         | 14.02          | 14.55       |

## 6. GFDL.ESM2M

### Statistics for GFDL.ESM2M climate projections over the study area

#### RCP4.5 - 2030s -

|                    | <b>units</b> | <b>Min.</b> | <b>1st Qu.</b> | <b>Median</b> | <b>3rd Qu.</b> | <b>Max.</b> |
|--------------------|--------------|-------------|----------------|---------------|----------------|-------------|
| <i>MAY.PREC</i>    | mm           | 52          | 61.62          | 68            | 72             | 87.58       |
| <i>JUN.PREC</i>    | mm           | 43          | 59.97          | 68.61         | 74             | 89.77       |
| <i>JUL.PREC</i>    | mm           | 53          | 65             | 67.98         | 72             | 89.69       |
| <i>AUG.PREC</i>    | mm           | 43          | 50             | 52            | 55             | 74.5        |
| <i>PREC.GC</i>     | mm           | 203         | 241            | 254.8         | 268.4          | 341.5       |
| <i>TEMP.GC</i>     | °C           | 15.93       | 16.52          | 16.74         | 16.93          | 17.37       |
| <i>TEMP.MIN.GC</i> | °C           | 11.33       | 11.9           | 12.1          | 12.39          | 12.95       |

#### RCP4.5 - 2050s -

|                    | <b>units</b> | <b>Min.</b> | <b>1st Qu.</b> | <b>Median</b> | <b>3rd Qu.</b> | <b>Max.</b> |
|--------------------|--------------|-------------|----------------|---------------|----------------|-------------|
| <i>MAY.PREC</i>    | mm           | 49          | 61             | 68.76         | 73             | 89.58       |
| <i>JUN.PREC</i>    | mm           | 45          | 59.5           | 67            | 71.33          | 85.77       |
| <i>JUL.PREC</i>    | mm           | 53          | 67             | 70.82         | 75.47          | 92.69       |
| <i>AUG.PREC</i>    | mm           | 41          | 50.2           | 53            | 55.36          | 79.5        |
| <i>PREC.GC</i>     | mm           | 199         | 241.9          | 257.6         | 273            | 347.5       |
| <i>TEMP.GC</i>     | °C           | 16.21       | 16.82          | 17.04         | 17.23          | 17.68       |
| <i>TEMP.MIN.GC</i> | °C           | 11.55       | 12.12          | 12.33         | 12.63          | 13.22       |

#### RCP4.5 - 2070s -

|                    | <b>units</b> | <b>Min.</b> | <b>1st Qu.</b> | <b>Median</b> | <b>3rd Qu.</b> | <b>Max.</b> |
|--------------------|--------------|-------------|----------------|---------------|----------------|-------------|
| <i>MAY.PREC</i>    | mm           | 49          | 59             | 67            | 72             | 87.58       |
| <i>JUN.PREC</i>    | mm           | 48          | 63             | 70            | 74             | 87.77       |
| <i>JUL.PREC</i>    | mm           | 52          | 67.75          | 71.54         | 76             | 92.69       |
| <i>AUG.PREC</i>    | mm           | 38          | 45.72          | 48            | 50.8           | 72.5        |
| <i>PREC.GC</i>     | mm           | 197         | 240            | 255           | 269.6          | 340.5       |
| <i>TEMP.GC</i>     | °C           | 16.21       | 16.8           | 17.02         | 17.21          | 17.65       |
| <i>TEMP.MIN.GC</i> | °C           | 11.5        | 12.13          | 12.38         | 12.69          | 13.27       |

#### RCP4.5 - 2080s -

|                    | <b>units</b> | <b>Min.</b> | <b>1st Qu.</b> | <b>Median</b> | <b>3rd Qu.</b> | <b>Max.</b> |
|--------------------|--------------|-------------|----------------|---------------|----------------|-------------|
| <i>MAY.PREC</i>    | mm           | 52          | 61             | 68.56         | 72             | 86.58       |
| <i>JUN.PREC</i>    | mm           | 49          | 64             | 72            | 76.78          | 89.77       |
| <i>JUL.PREC</i>    | mm           | 49          | 63             | 66            | 69.91          | 86.69       |
| <i>AUG.PREC</i>    | mm           | 44          | 50.94          | 53            | 55.62          | 74.5        |
| <i>PREC.GC</i>     | mm           | 205         | 244            | 257           | 269.6          | 337.5       |
| <i>TEMP.GC</i>     | °C           | 16.02       | 16.59          | 16.82         | 17             | 17.47       |
| <i>TEMP.MIN.GC</i> | °C           | 11.43       | 12             | 12.22         | 12.52          | 13.05       |

#### RCP8.5 - 2030s -

|                 | <b>units</b> | <b>Min.</b> | <b>1st Qu.</b> | <b>Median</b> | <b>3rd Qu.</b> | <b>Max.</b> |
|-----------------|--------------|-------------|----------------|---------------|----------------|-------------|
| <i>MAY.PREC</i> | mm           | 50          | 60             | 69            | 74.3           | 90.58       |
| <i>JUN.PREC</i> | mm           | 42          | 57             | 64.16         | 68.2           | 82.77       |
| <i>JUL.PREC</i> | mm           | 56          | 70             | 73            | 77             | 94.43       |
| <i>AUG.PREC</i> | mm           | 44          | 50             | 52.57         | 55             | 71.5        |

|                    |    |       |       |       |       |       |
|--------------------|----|-------|-------|-------|-------|-------|
| <i>PREC.GC</i>     | mm | 204   | 244   | 257.4 | 270   | 338.5 |
| <i>TEMP.GC</i>     | °C | 15.98 | 16.6  | 16.84 | 17.04 | 17.47 |
| <i>TEMP.MIN.GC</i> | °C | 11.53 | 12.03 | 12.18 | 12.43 | 12.95 |

#### RCP8.5 - 2050s -

|                    | <b>units</b> | <b>Min.</b> | <b>1st Qu.</b> | <b>Median</b> | <b>3rd Qu.</b> | <b>Max.</b> |
|--------------------|--------------|-------------|----------------|---------------|----------------|-------------|
| <i>MAY.PREC</i>    | mm           | 51          | 62             | 69            | 72             | 85.58       |
| <i>JUN.PREC</i>    | mm           | 40          | 54.35          | 61.14         | 64.24          | 77.77       |
| <i>JUL.PREC</i>    | mm           | 45          | 57.06          | 59.94         | 62             | 75.52       |
| <i>AUG.PREC</i>    | mm           | 41          | 51             | 53            | 55.51          | 75.5        |
| <i>PREC.GC</i>     | mm           | 188         | 230            | 241.4         | 251            | 313.5       |
| <i>TEMP.GC</i>     | °C           | 16.47       | 17.05          | 17.27         | 17.46          | 17.91       |
| <i>TEMP.MIN.GC</i> | °C           | 11.83       | 12.38          | 12.56         | 12.84          | 13.35       |

#### RCP8.5 - 2070s -

|                    | <b>units</b> | <b>Min.</b> | <b>1st Qu.</b> | <b>Median</b> | <b>3rd Qu.</b> | <b>Max.</b> |
|--------------------|--------------|-------------|----------------|---------------|----------------|-------------|
| <i>MAY.PREC</i>    | mm           | 51          | 61             | 68            | 71             | 84.88       |
| <i>JUN.PREC</i>    | mm           | 42          | 57             | 64            | 68             | 80.77       |
| <i>JUL.PREC</i>    | mm           | 38.24       | 51.07          | 53.97         | 55.72          | 68.69       |
| <i>AUG.PREC</i>    | mm           | 30.76       | 40.33          | 43            | 45.25          | 68.5        |
| <i>PREC.GC</i>     | mm           | 173         | 214.7          | 227           | 238.5          | 302.5       |
| <i>TEMP.GC</i>     | °C           | 17.02       | 17.6           | 17.83         | 18.03          | 18.51       |
| <i>TEMP.MIN.GC</i> | °C           | 12.28       | 12.86          | 13.05         | 13.33          | 13.85       |

#### RCP8.5 - 2080s -

|                    | <b>units</b> | <b>Min.</b> | <b>1st Qu.</b> | <b>Median</b> | <b>3rd Qu.</b> | <b>Max.</b> |
|--------------------|--------------|-------------|----------------|---------------|----------------|-------------|
| <i>MAY.PREC</i>    | mm           | 50          | 60             | 68.61         | 73             | 88.58       |
| <i>JUN.PREC</i>    | mm           | 40          | 55.02          | 64.18         | 70             | 83.77       |
| <i>JUL.PREC</i>    | mm           | 40          | 53.68          | 56            | 59             | 73.69       |
| <i>AUG.PREC</i>    | mm           | 29          | 38.81          | 41            | 44             | 66.5        |
| <i>PREC.GC</i>     | mm           | 170         | 212            | 228.3         | 243            | 312.5       |
| <i>TEMP.GC</i>     | °C           | 17.26       | 17.84          | 18.06         | 18.27          | 18.75       |
| <i>TEMP.MIN.GC</i> | °C           | 12.58       | 13.1           | 13.28         | 13.57          | 14.1        |

## 7. MOHC.HADGEM2.CC

Statistics for MOHC.HADGEM2.CC climate projections over the study area

### RCP4.5 - 2030s -

|                    | <b>units</b> | <b>Min.</b> | <b>1st Qu.</b> | <b>Median</b> | <b>3rd Qu.</b> | <b>Max.</b> |
|--------------------|--------------|-------------|----------------|---------------|----------------|-------------|
| <i>MAY.PREC</i>    | mm           | 60          | 68.83          | 78            | 84             | 98.58       |
| <i>JUN.PREC</i>    | mm           | 45          | 60.2           | 68            | 73             | 87.77       |
| <i>JUL.PREC</i>    | mm           | 48          | 59             | 61            | 63             | 81.69       |
| <i>AUG.PREC</i>    | mm           | 48          | 56.17          | 59            | 61.31          | 84.5        |
| <i>PREC.GC</i>     | mm           | 211         | 249.9          | 264           | 278            | 352.5       |
| <i>TEMP.GC</i>     | °C           | 17.51       | 18             | 18.21         | 18.4           | 18.9        |
| <i>TEMP.MIN.GC</i> | °C           | 12.55       | 13.13          | 13.35         | 13.69          | 14.22       |

### RCP4.5 - 2050s -

|                    | <b>units</b> | <b>Min.</b> | <b>1st Qu.</b> | <b>Median</b> | <b>3rd Qu.</b> | <b>Max.</b> |
|--------------------|--------------|-------------|----------------|---------------|----------------|-------------|
| <i>MAY.PREC</i>    | mm           | 54          | 64             | 73.2          | 79             | 93.58       |
| <i>JUN.PREC</i>    | mm           | 38          | 55             | 63            | 66             | 80.77       |
| <i>JUL.PREC</i>    | mm           | 36          | 48.16          | 51.02         | 54.89          | 74.69       |
| <i>AUG.PREC</i>    | mm           | 40          | 48             | 50            | 52.61          | 73.6        |
| <i>PREC.GC</i>     | mm           | 176         | 219.5          | 235           | 249            | 322.6       |
| <i>TEMP.GC</i>     | °C           | 18.15       | 18.63          | 18.84         | 19.07          | 19.57       |
| <i>TEMP.MIN.GC</i> | °C           | 13.15       | 13.62          | 13.82         | 14.16          | 14.62       |

### RCP4.5 - 2070s -

|                    | <b>units</b> | <b>Min.</b> | <b>1st Qu.</b> | <b>Median</b> | <b>3rd Qu.</b> | <b>Max.</b> |
|--------------------|--------------|-------------|----------------|---------------|----------------|-------------|
| <i>MAY.PREC</i>    | mm           | 46          | 57             | 66.34         | 71.38          | 86.58       |
| <i>JUN.PREC</i>    | mm           | 45          | 63             | 72            | 76             | 91.77       |
| <i>JUL.PREC</i>    | mm           | 39          | 53.06          | 56            | 58             | 77.69       |
| <i>AUG.PREC</i>    | mm           | 46          | 54             | 56.11         | 59             | 82.5        |
| <i>PREC.GC</i>     | mm           | 184.8       | 232            | 248           | 262            | 338.5       |
| <i>TEMP.GC</i>     | °C           | 18.16       | 18.62          | 18.82         | 19.01          | 19.53       |
| <i>TEMP.MIN.GC</i> | °C           | 13.08       | 13.63          | 13.87         | 14.24          | 14.75       |

### RCP4.5 - 2080s -

|                    | <b>units</b> | <b>Min.</b> | <b>1st Qu.</b> | <b>Median</b> | <b>3rd Qu.</b> | <b>Max.</b> |
|--------------------|--------------|-------------|----------------|---------------|----------------|-------------|
| <i>MAY.PREC</i>    | mm           | 45          | 55             | 64.21         | 69             | 83.58       |
| <i>JUN.PREC</i>    | mm           | 44          | 61.87          | 69            | 73             | 89.77       |
| <i>JUL.PREC</i>    | mm           | 37          | 51.32          | 54            | 56             | 74.69       |
| <i>AUG.PREC</i>    | mm           | 42.63       | 50             | 52.55         | 55             | 77.5        |
| <i>PREC.GC</i>     | mm           | 177         | 223            | 238           | 250.6          | 325.5       |
| <i>TEMP.GC</i>     | °C           | 18.56       | 19.03          | 19.23         | 19.42          | 19.95       |
| <i>TEMP.MIN.GC</i> | °C           | 13.4        | 13.97          | 14.2          | 14.58          | 15.08       |

### RCP8.5 - 2030s -

|                 | <b>units</b> | <b>Min.</b> | <b>1st Qu.</b> | <b>Median</b> | <b>3rd Qu.</b> | <b>Max.</b> |
|-----------------|--------------|-------------|----------------|---------------|----------------|-------------|
| <i>MAY.PREC</i> | mm           | 45          | 55             | 63            | 67.72          | 83.58       |
| <i>JUN.PREC</i> | mm           | 48          | 66             | 75.47         | 81.52          | 100.8       |
| <i>JUL.PREC</i> | mm           | 44          | 56             | 58            | 60             | 77.69       |
| <i>AUG.PREC</i> | mm           | 50.38       | 58             | 60.29         | 63             | 84.5        |



|                    |    |       |       |       |       |       |
|--------------------|----|-------|-------|-------|-------|-------|
| <i>PREC.GC</i>     | mm | 198.4 | 239.4 | 254.9 | 268.7 | 346.5 |
| <i>TEMP.GC</i>     | °C | 17.96 | 18.45 | 18.67 | 18.87 | 19.32 |
| <i>TEMP.MIN.GC</i> | °C | 13    | 13.55 | 13.78 | 14.11 | 14.62 |

#### RCP8.5 - 2050s -

|                    | <b>units</b> | <b>Min.</b> | <b>1st Qu.</b> | <b>Median</b> | <b>3rd Qu.</b> | <b>Max.</b> |
|--------------------|--------------|-------------|----------------|---------------|----------------|-------------|
| <i>MAY.PREC</i>    | mm           | 47          | 57.05          | 66            | 70             | 83.58       |
| <i>JUN.PREC</i>    | mm           | 46          | 62.09          | 70.97         | 75             | 90.77       |
| <i>JUL.PREC</i>    | mm           | 37          | 49             | 51.92         | 54.04          | 73.69       |
| <i>AUG.PREC</i>    | mm           | 36.99       | 46.7           | 49            | 51             | 71.5        |
| <i>PREC.GC</i>     | mm           | 176.8       | 219.1          | 235.1         | 248            | 319.5       |
| <i>TEMP.GC</i>     | °C           | 19.35       | 19.84          | 20.04         | 20.28          | 20.77       |
| <i>TEMP.MIN.GC</i> | °C           | 14.3        | 14.78          | 14.99         | 15.34          | 15.8        |

#### RCP8.5 - 2070s -

|                    | <b>units</b> | <b>Min.</b> | <b>1st Qu.</b> | <b>Median</b> | <b>3rd Qu.</b> | <b>Max.</b> |
|--------------------|--------------|-------------|----------------|---------------|----------------|-------------|
| <i>MAY.PREC</i>    | mm           | 47          | 55.01          | 65            | 71.03          | 89.5        |
| <i>JUN.PREC</i>    | mm           | 38          | 57             | 67            | 73             | 90.77       |
| <i>JUL.PREC</i>    | mm           | 31          | 44             | 47            | 49             | 67.69       |
| <i>AUG.PREC</i>    | mm           | 27.02       | 35             | 37.03         | 40             | 58.5        |
| <i>PREC.GC</i>     | mm           | 154         | 196            | 213.8         | 229.1          | 306.5       |
| <i>TEMP.GC</i>     | °C           | 20.75       | 21.28          | 21.47         | 21.72          | 22.19       |
| <i>TEMP.MIN.GC</i> | °C           | 15.66       | 16.11          | 16.31         | 16.68          | 17.15       |

#### RCP8.5 - 2080s -

|                    | <b>units</b> | <b>Min.</b> | <b>1st Qu.</b> | <b>Median</b> | <b>3rd Qu.</b> | <b>Max.</b> |
|--------------------|--------------|-------------|----------------|---------------|----------------|-------------|
| <i>MAY.PREC</i>    | mm           | 49          | 55.06          | 64            | 69.89          | 86.58       |
| <i>JUN.PREC</i>    | mm           | 33          | 52.78          | 64            | 71             | 90.77       |
| <i>JUL.PREC</i>    | mm           | 28          | 41             | 44            | 46.04          | 64.69       |
| <i>AUG.PREC</i>    | mm           | 27.98       | 36.39          | 39            | 41             | 65.5        |
| <i>PREC.GC</i>     | mm           | 148.6       | 189            | 208.3         | 226            | 307.5       |
| <i>TEMP.GC</i>     | °C           | 21.15       | 21.75          | 21.95         | 22.22          | 22.73       |
| <i>TEMP.MIN.GC</i> | °C           | 16.1        | 16.57          | 16.75         | 17.12          | 17.62       |

## 8. MOHC.HADGEM2.ES

Statistics for MOHC.HADGEM2.ES climate projections over the study area

### RCP4.5 - 2030s -

|                    | <b>units</b> | <b>Min.</b> | <b>1st Qu.</b> | <b>Median</b> | <b>3rd Qu.</b> | <b>Max.</b> |
|--------------------|--------------|-------------|----------------|---------------|----------------|-------------|
| <i>MAY.PREC</i>    | mm           | 50          | 63             | 74.08         | 82.38          | 101.8       |
| <i>JUN.PREC</i>    | mm           | 49          | 63.03          | 70            | 75             | 90.77       |
| <i>JUL.PREC</i>    | mm           | 48          | 58             | 60            | 63             | 81.69       |
| <i>AUG.PREC</i>    | mm           | 54          | 61             | 63.01         | 66             | 81.5        |
| <i>PREC.GC</i>     | mm           | 216         | 252.3          | 265.9         | 280.3          | 355.7       |
| <i>TEMP.GC</i>     | °C           | 17.88       | 18.41          | 18.63         | 18.81          | 19.28       |
| <i>TEMP.MIN.GC</i> | °C           | 13          | 13.58          | 13.79         | 14.09          | 14.63       |

### RCP4.5 - 2050s -

|                    | <b>units</b> | <b>Min.</b> | <b>1st Qu.</b> | <b>Median</b> | <b>3rd Qu.</b> | <b>Max.</b> |
|--------------------|--------------|-------------|----------------|---------------|----------------|-------------|
| <i>MAY.PREC</i>    | mm           | 55          | 67             | 77            | 83             | 97.58       |
| <i>JUN.PREC</i>    | mm           | 41.11       | 57             | 64            | 69.63          | 87.77       |
| <i>JUL.PREC</i>    | mm           | 46          | 55             | 57            | 59             | 77.69       |
| <i>AUG.PREC</i>    | mm           | 51          | 57.2           | 60            | 63             | 79.5        |
| <i>PREC.GC</i>     | mm           | 207.1       | 243            | 256           | 268.3          | 342.5       |
| <i>TEMP.GC</i>     | °C           | 18.72       | 19.28          | 19.52         | 19.77          | 20.18       |
| <i>TEMP.MIN.GC</i> | °C           | 13.88       | 14.35          | 14.5          | 14.77          | 15.25       |

### RCP4.5 - 2070s -

|                    | <b>units</b> | <b>Min.</b> | <b>1st Qu.</b> | <b>Median</b> | <b>3rd Qu.</b> | <b>Max.</b> |
|--------------------|--------------|-------------|----------------|---------------|----------------|-------------|
| <i>MAY.PREC</i>    | mm           | 53          | 63             | 70.94         | 75             | 90.58       |
| <i>JUN.PREC</i>    | mm           | 40          | 55             | 63.91         | 70             | 88.77       |
| <i>JUL.PREC</i>    | mm           | 49          | 58             | 59.85         | 62             | 81.69       |
| <i>AUG.PREC</i>    | mm           | 51          | 58             | 60            | 62.36          | 78.5        |
| <i>PREC.GC</i>     | mm           | 206         | 239.3          | 251.6         | 265.4          | 339.5       |
| <i>TEMP.GC</i>     | °C           | 19.22       | 19.79          | 20.01         | 20.28          | 20.74       |
| <i>TEMP.MIN.GC</i> | °C           | 14.38       | 14.81          | 14.98         | 15.27          | 15.7        |

### RCP4.5 - 2080s -

|                    | <b>units</b> | <b>Min.</b> | <b>1st Qu.</b> | <b>Median</b> | <b>3rd Qu.</b> | <b>Max.</b> |
|--------------------|--------------|-------------|----------------|---------------|----------------|-------------|
| <i>MAY.PREC</i>    | mm           | 53          | 62             | 68.52         | 72             | 85.58       |
| <i>JUN.PREC</i>    | mm           | 44          | 60             | 67.97         | 73             | 89.77       |
| <i>JUL.PREC</i>    | mm           | 50          | 58             | 61            | 64.31          | 84.69       |
| <i>AUG.PREC</i>    | mm           | 47          | 53.83          | 55.76         | 58             | 73.5        |
| <i>PREC.GC</i>     | mm           | 206         | 239            | 250.5         | 263            | 333.5       |
| <i>TEMP.GC</i>     | °C           | 19.12       | 19.68          | 19.92         | 20.18          | 20.63       |
| <i>TEMP.MIN.GC</i> | °C           | 14.33       | 14.78          | 14.96         | 15.26          | 15.7        |

### RCP8.5 - 2030s -

|                 | <b>units</b> | <b>Min.</b> | <b>1st Qu.</b> | <b>Median</b> | <b>3rd Qu.</b> | <b>Max.</b> |
|-----------------|--------------|-------------|----------------|---------------|----------------|-------------|
| <i>MAY.PREC</i> | mm           | 54          | 65.15          | 75            | 80             | 96.58       |
| <i>JUN.PREC</i> | mm           | 39          | 55             | 63            | 69.07          | 87.77       |
| <i>JUL.PREC</i> | mm           | 60          | 67             | 69            | 73             | 94.69       |
| <i>AUG.PREC</i> | mm           | 46          | 52.5           | 55            | 57             | 74.5        |

|                    |    |       |       |       |       |       |
|--------------------|----|-------|-------|-------|-------|-------|
| <i>PREC.GC</i>     | mm | 209   | 244   | 259.2 | 275.5 | 353.5 |
| <i>TEMP.GC</i>     | °C | 18.19 | 18.72 | 18.94 | 19.15 | 19.6  |
| <i>TEMP.MIN.GC</i> | °C | 13.3  | 13.8  | 13.99 | 14.27 | 14.77 |

#### RCP8.5 - 2050s -

|                    | <b>units</b> | <b>Min.</b> | <b>1st Qu.</b> | <b>Median</b> | <b>3rd Qu.</b> | <b>Max.</b> |
|--------------------|--------------|-------------|----------------|---------------|----------------|-------------|
| <i>MAY.PREC</i>    | mm           | 53          | 64             | 69            | 73             | 88.58       |
| <i>JUN.PREC</i>    | mm           | 41          | 57             | 63.79         | 69.62          | 89.77       |
| <i>JUL.PREC</i>    | mm           | 50          | 60             | 63            | 66             | 84.69       |
| <i>AUG.PREC</i>    | mm           | 46          | 53             | 55            | 57.25          | 73.5        |
| <i>PREC.GC</i>     | mm           | 202.2       | 237.5          | 249           | 262.2          | 336.5       |
| <i>TEMP.GC</i>     | °C           | 19.32       | 19.9           | 20.13         | 20.38          | 20.8        |
| <i>TEMP.MIN.GC</i> | °C           | 14.5        | 14.98          | 15.15         | 15.44          | 15.9        |

#### RCP8.5 - 2070s -

|                    | <b>units</b> | <b>Min.</b> | <b>1st Qu.</b> | <b>Median</b> | <b>3rd Qu.</b> | <b>Max.</b> |
|--------------------|--------------|-------------|----------------|---------------|----------------|-------------|
| <i>MAY.PREC</i>    | mm           | 58          | 69             | 76            | 79.81          | 94.58       |
| <i>JUN.PREC</i>    | mm           | 41          | 57.26          | 66            | 71.78          | 90.77       |
| <i>JUL.PREC</i>    | mm           | 42          | 51.02          | 53.08         | 55             | 71.69       |
| <i>AUG.PREC</i>    | mm           | 42          | 49             | 50.9          | 53             | 68.5        |
| <i>PREC.GC</i>     | mm           | 195         | 232            | 243.9         | 255            | 325.5       |
| <i>TEMP.GC</i>     | °C           | 20.67       | 21.28          | 21.52         | 21.83          | 22.3        |
| <i>TEMP.MIN.GC</i> | °C           | 15.9        | 16.35          | 16.5          | 16.75          | 17.17       |

#### RCP8.5 - 2080s -

|                    | <b>units</b> | <b>Min.</b> | <b>1st Qu.</b> | <b>Median</b> | <b>3rd Qu.</b> | <b>Max.</b> |
|--------------------|--------------|-------------|----------------|---------------|----------------|-------------|
| <i>MAY.PREC</i>    | mm           | 62          | 75             | 83            | 86             | 100.6       |
| <i>JUN.PREC</i>    | mm           | 43          | 59             | 67            | 72.21          | 90.77       |
| <i>JUL.PREC</i>    | mm           | 39          | 48             | 49.69         | 50.89          | 66.69       |
| <i>AUG.PREC</i>    | mm           | 39          | 45             | 47            | 50             | 64.5        |
| <i>PREC.GC</i>     | mm           | 194         | 233.4          | 244           | 254            | 322.5       |
| <i>TEMP.GC</i>     | °C           | 21.2        | 21.9           | 22.15         | 22.5           | 23.02       |
| <i>TEMP.MIN.GC</i> | °C           | 16.47       | 16.93          | 17.08         | 17.31          | 17.75       |

## 9. MPI.ESM.LR

### Statistics for MPI.ESM.LR climate projections over the study area

#### RCP4.5 - 2030s -

|                    | <b>units</b> | <b>Min.</b> | <b>1st Qu.</b> | <b>Median</b> | <b>3rd Qu.</b> | <b>Max.</b> |
|--------------------|--------------|-------------|----------------|---------------|----------------|-------------|
| <i>MAY.PREC</i>    | mm           | 56          | 65             | 68            | 70             | 80.58       |
| <i>JUN.PREC</i>    | mm           | 52          | 71             | 81            | 86             | 100.8       |
| <i>JUL.PREC</i>    | mm           | 59          | 67             | 68            | 71             | 92.69       |
| <i>AUG.PREC</i>    | mm           | 28          | 32.91          | 34.23         | 42.36          | 71.5        |
| <i>PREC.GC</i>     | mm           | 200         | 237.2          | 252.6         | 268.8          | 345.5       |
| <i>TEMP.GC</i>     | °C           | 15.62       | 16.26          | 16.48         | 16.67          | 17.12       |
| <i>TEMP.MIN.GC</i> | °C           | 11.43       | 11.91          | 12.05         | 12.28          | 12.75       |

#### RCP4.5 - 2050s -

|                    | <b>units</b> | <b>Min.</b> | <b>1st Qu.</b> | <b>Median</b> | <b>3rd Qu.</b> | <b>Max.</b> |
|--------------------|--------------|-------------|----------------|---------------|----------------|-------------|
| <i>MAY.PREC</i>    | mm           | 56          | 65             | 68.12         | 70             | 78.88       |
| <i>JUN.PREC</i>    | mm           | 51          | 67             | 78            | 86             | 104.8       |
| <i>JUL.PREC</i>    | mm           | 56          | 61             | 62.15         | 67             | 90.69       |
| <i>AUG.PREC</i>    | mm           | 38          | 43             | 45            | 50.83          | 77.5        |
| <i>PREC.GC</i>     | mm           | 208         | 237.1          | 252.5         | 272.9          | 351.5       |
| <i>TEMP.GC</i>     | °C           | 15.84       | 16.46          | 16.68         | 16.88          | 17.33       |
| <i>TEMP.MIN.GC</i> | °C           | 11.63       | 12.1           | 12.24         | 12.47          | 12.95       |

#### RCP4.5 - 2070s -

|                    | <b>units</b> | <b>Min.</b> | <b>1st Qu.</b> | <b>Median</b> | <b>3rd Qu.</b> | <b>Max.</b> |
|--------------------|--------------|-------------|----------------|---------------|----------------|-------------|
| <i>MAY.PREC</i>    | mm           | 59          | 70             | 77            | 80.02          | 94.58       |
| <i>JUN.PREC</i>    | mm           | 51          | 66.99          | 75.9          | 83.27          | 102.8       |
| <i>JUL.PREC</i>    | mm           | 46          | 53             | 54.78         | 58             | 76.69       |
| <i>AUG.PREC</i>    | mm           | 30.63       | 35             | 37            | 46             | 73.5        |
| <i>PREC.GC</i>     | mm           | 192         | 225.5          | 244.3         | 266.4          | 347.5       |
| <i>TEMP.GC</i>     | °C           | 16.24       | 16.86          | 17.09         | 17.29          | 17.75       |
| <i>TEMP.MIN.GC</i> | °C           | 11.98       | 12.47          | 12.62         | 12.84          | 13.35       |

#### RCP4.5 - 2080s -

|                    | <b>units</b> | <b>Min.</b> | <b>1st Qu.</b> | <b>Median</b> | <b>3rd Qu.</b> | <b>Max.</b> |
|--------------------|--------------|-------------|----------------|---------------|----------------|-------------|
| <i>MAY.PREC</i>    | mm           | 62          | 73.02          | 79.63         | 82.37          | 95.58       |
| <i>JUN.PREC</i>    | mm           | 51          | 67.98          | 75            | 80.64          | 97.77       |
| <i>JUL.PREC</i>    | mm           | 43          | 51             | 52            | 53.92          | 71.69       |
| <i>AUG.PREC</i>    | mm           | 28          | 31             | 33            | 41.98          | 69.83       |
| <i>PREC.GC</i>     | mm           | 189         | 224.5          | 239.4         | 257.2          | 334.5       |
| <i>TEMP.GC</i>     | °C           | 16.38       | 17.01          | 17.24         | 17.44          | 17.88       |
| <i>TEMP.MIN.GC</i> | °C           | 12.11       | 12.59          | 12.74         | 12.97          | 13.45       |

#### RCP8.5 - 2030s

|                 | <b>units</b> | <b>Min.</b> | <b>1st Qu.</b> | <b>Median</b> | <b>3rd Qu.</b> | <b>Max.</b> |
|-----------------|--------------|-------------|----------------|---------------|----------------|-------------|
| <i>MAY.PREC</i> | mm           | 54          | 64             | 71            | 73.59          | 86.58       |
| <i>JUN.PREC</i> | mm           | 52          | 68             | 76.99         | 82             | 97.77       |
| <i>JUL.PREC</i> | mm           | 48          | 54             | 55            | 58.65          | 79.69       |
| <i>AUG.PREC</i> | mm           | 29          | 35             | 36.09         | 44.85          | 72.5        |

|                    |    |       |       |       |       |       |
|--------------------|----|-------|-------|-------|-------|-------|
| <i>PREC.GC</i>     | mm | 189.4 | 221.9 | 238.6 | 258.1 | 336.5 |
| <i>TEMP.GC</i>     | °C | 15.98 | 16.6  | 16.83 | 17.05 | 17.5  |
| <i>TEMP.MIN.GC</i> | °C | 11.58 | 12.08 | 12.22 | 12.45 | 12.93 |

#### RCP8.5 - 2050s -

|                    | <b>units</b> | <b>Min.</b> | <b>1st Qu.</b> | <b>Median</b> | <b>3rd Qu.</b> | <b>Max.</b> |
|--------------------|--------------|-------------|----------------|---------------|----------------|-------------|
| <i>MAY.PREC</i>    | mm           | 57          | 68             | 75            | 77             | 89.56       |
| <i>JUN.PREC</i>    | mm           | 37          | 53             | 61.27         | 68             | 84.77       |
| <i>JUL.PREC</i>    | mm           | 47          | 51             | 52.35         | 56             | 76.69       |
| <i>AUG.PREC</i>    | mm           | 18.41       | 23             | 25.22         | 37.13          | 70.5        |
| <i>PREC.GC</i>     | mm           | 163.1       | 196.8          | 215           | 237.9          | 321.5       |
| <i>TEMP.GC</i>     | °C           | 16.65       | 17.29          | 17.55         | 17.79          | 18.2        |
| <i>TEMP.MIN.GC</i> | °C           | 12.26       | 12.73          | 12.87         | 13.1           | 13.55       |

#### RCP8.5 - 2070s -

|                    | <b>units</b> | <b>Min.</b> | <b>1st Qu.</b> | <b>Median</b> | <b>3rd Qu.</b> | <b>Max.</b> |
|--------------------|--------------|-------------|----------------|---------------|----------------|-------------|
| <i>MAY.PREC</i>    | mm           | 59          | 70.02          | 77            | 79             | 89.88       |
| <i>JUN.PREC</i>    | mm           | 43          | 58             | 64.14         | 68             | 80.63       |
| <i>JUL.PREC</i>    | mm           | 42          | 45             | 46            | 49.33          | 70.69       |
| <i>AUG.PREC</i>    | mm           | 13.25       | 18.16          | 21.11         | 35.83          | 71.5        |
| <i>PREC.GC</i>     | mm           | 159         | 192            | 209           | 232.2          | 311.8       |
| <i>TEMP.GC</i>     | °C           | 17.47       | 18.16          | 18.46         | 18.73          | 19.17       |
| <i>TEMP.MIN.GC</i> | °C           | 13.16       | 13.64          | 13.77         | 13.95          | 14.37       |

#### RCP8.5 - 2080s -

|                    | <b>units</b> | <b>Min.</b> | <b>1st Qu.</b> | <b>Median</b> | <b>3rd Qu.</b> | <b>Max.</b> |
|--------------------|--------------|-------------|----------------|---------------|----------------|-------------|
| <i>MAY.PREC</i>    | mm           | 66          | 75.23          | 78            | 80.28          | 88.58       |
| <i>JUN.PREC</i>    | mm           | 42          | 56.87          | 63.02         | 67.27          | 80.77       |
| <i>JUL.PREC</i>    | mm           | 31.65       | 34             | 36            | 41.96          | 64.69       |
| <i>AUG.PREC</i>    | mm           | 7           | 11             | 14            | 28.28          | 62.52       |
| <i>PREC.GC</i>     | mm           | 147.3       | 178            | 193.9         | 217            | 296.5       |
| <i>TEMP.GC</i>     | °C           | 17.77       | 18.51          | 18.85         | 19.14          | 19.68       |
| <i>TEMP.MIN.GC</i> | °C           | 13.56       | 14.03          | 14.15         | 14.3           | 14.67       |

## 10. NCAR.CCSM4

### Statistics for NCAR.CCSM4 climate projections over the study area

#### RCP4.5 - 2030s -

|                    | <b>units</b> | <b>Min.</b> | <b>1st Qu.</b> | <b>Median</b> | <b>3rd Qu.</b> | <b>Max.</b> |
|--------------------|--------------|-------------|----------------|---------------|----------------|-------------|
| <i>MAY.PREC</i>    | mm           | 27.11       | 36             | 44.65         | 50             | 66.58       |
| <i>JUN.PREC</i>    | mm           | 33.21       | 47             | 51            | 55             | 74.77       |
| <i>JUL.PREC</i>    | mm           | 57          | 61.92          | 63            | 63.77          | 82.69       |
| <i>AUG.PREC</i>    | mm           | 42          | 50             | 52            | 54             | 79.5        |
| <i>PREC.GC</i>     | mm           | 169.1       | 198            | 207.8         | 221            | 303.5       |
| <i>TEMP.GC</i>     | °C           | 16.6        | 17.27          | 17.52         | 17.75          | 18.22       |
| <i>TEMP.MIN.GC</i> | °C           | 11.68       | 12.18          | 12.39         | 12.73          | 13.32       |

#### RCP4.5 - 2050s -

|                    | <b>units</b> | <b>Min.</b> | <b>1st Qu.</b> | <b>Median</b> | <b>3rd Qu.</b> | <b>Max.</b> |
|--------------------|--------------|-------------|----------------|---------------|----------------|-------------|
| <i>MAY.PREC</i>    | mm           | 19          | 31             | 41            | 47             | 63.58       |
| <i>JUN.PREC</i>    | mm           | 27          | 41             | 46            | 51             | 74.77       |
| <i>JUL.PREC</i>    | mm           | 57          | 63.4           | 65            | 68             | 88.69       |
| <i>AUG.PREC</i>    | mm           | 44.38       | 52             | 54            | 56             | 79.5        |
| <i>PREC.GC</i>     | mm           | 156         | 190            | 204.3         | 221            | 306.5       |
| <i>TEMP.GC</i>     | °C           | 17.08       | 17.72          | 17.96         | 18.18          | 18.65       |
| <i>TEMP.MIN.GC</i> | °C           | 12.08       | 12.57          | 12.78         | 13.15          | 13.78       |

#### RCP4.5 - 2070s -

|                    | <b>units</b> | <b>Min.</b> | <b>1st Qu.</b> | <b>Median</b> | <b>3rd Qu.</b> | <b>Max.</b> |
|--------------------|--------------|-------------|----------------|---------------|----------------|-------------|
| <i>MAY.PREC</i>    | mm           | 30          | 42             | 51            | 57             | 70.58       |
| <i>JUN.PREC</i>    | mm           | 26          | 41             | 44            | 46.13          | 62.77       |
| <i>JUL.PREC</i>    | mm           | 49          | 57             | 59.01         | 63.98          | 86.69       |
| <i>AUG.PREC</i>    | mm           | 44          | 53             | 55.1          | 57             | 82.5        |
| <i>PREC.GC</i>     | mm           | 160         | 196            | 208.7         | 223            | 302.5       |
| <i>TEMP.GC</i>     | °C           | 17.28       | 17.94          | 18.21         | 18.45          | 18.9        |
| <i>TEMP.MIN.GC</i> | °C           | 12.21       | 12.77          | 12.96         | 13.28          | 13.93       |

#### RCP4.5 - 2080s -

|                    | <b>units</b> | <b>Min.</b> | <b>1st Qu.</b> | <b>Median</b> | <b>3rd Qu.</b> | <b>Max.</b> |
|--------------------|--------------|-------------|----------------|---------------|----------------|-------------|
| <i>MAY.PREC</i>    | mm           | 30          | 40             | 47.66         | 52             | 65.58       |
| <i>JUN.PREC</i>    | mm           | 28          | 44.72          | 49            | 52             | 67.77       |
| <i>JUL.PREC</i>    | mm           | 47          | 56             | 58            | 62.18          | 82.69       |
| <i>AUG.PREC</i>    | mm           | 48.63       | 56             | 59            | 61             | 88.5        |
| <i>PREC.GC</i>     | mm           | 163.3       | 200.3          | 211.9         | 225.3          | 304.5       |
| <i>TEMP.GC</i>     | °C           | 17.21       | 17.92          | 18.2          | 18.45          | 18.9        |
| <i>TEMP.MIN.GC</i> | °C           | 12.16       | 12.7           | 12.9          | 13.22          | 13.87       |

#### RCP8.5 - 2030s -

|                 | <b>units</b> | <b>Min.</b> | <b>1st Qu.</b> | <b>Median</b> | <b>3rd Qu.</b> | <b>Max.</b> |
|-----------------|--------------|-------------|----------------|---------------|----------------|-------------|
| <i>MAY.PREC</i> | mm           | 34          | 45             | 53.99         | 59             | 75.58       |
| <i>JUN.PREC</i> | mm           | 35          | 49             | 55            | 60.91          | 82.77       |
| <i>JUL.PREC</i> | mm           | 53          | 62             | 65            | 69.2           | 92.69       |
| <i>AUG.PREC</i> | mm           | 51          | 63             | 65            | 67.91          | 89.5        |

|                    |    |       |       |       |       |       |
|--------------------|----|-------|-------|-------|-------|-------|
| <i>PREC.GC</i>     | mm | 183   | 220.8 | 237.3 | 255.6 | 340.5 |
| <i>TEMP.GC</i>     | °C | 16.33 | 17.13 | 17.36 | 17.57 | 18.05 |
| <i>TEMP.MIN.GC</i> | °C | 11    | 12.14 | 12.45 | 12.81 | 13.45 |

#### RCP8.5 - 2050s -

|                    | <b>units</b> | <b>Min.</b> | <b>1st Qu.</b> | <b>Median</b> | <b>3rd Qu.</b> | <b>Max.</b> |
|--------------------|--------------|-------------|----------------|---------------|----------------|-------------|
| <i>MAY.PREC</i>    | mm           | 30          | 40.15          | 50            | 56             | 71.58       |
| <i>JUN.PREC</i>    | mm           | 33          | 48             | 55.88         | 61.71          | 84.77       |
| <i>JUL.PREC</i>    | mm           | 58          | 64             | 65            | 66.42          | 85.69       |
| <i>AUG.PREC</i>    | mm           | 42.95       | 56.22          | 58            | 62             | 84.5        |
| <i>PREC.GC</i>     | mm           | 172.3       | 210            | 227.4         | 245            | 326.5       |
| <i>TEMP.GC</i>     | °C           | 17.31       | 18.06          | 18.3          | 18.54          | 19.03       |
| <i>TEMP.MIN.GC</i> | °C           | 11.73       | 12.98          | 13.26         | 13.54          | 14.12       |

#### RCP8.5 - 2070s -

|                    | <b>units</b> | <b>Min.</b> | <b>1st Qu.</b> | <b>Median</b> | <b>3rd Qu.</b> | <b>Max.</b> |
|--------------------|--------------|-------------|----------------|---------------|----------------|-------------|
| <i>MAY.PREC</i>    | mm           | 23          | 33.17          | 42            | 47             | 60.58       |
| <i>JUN.PREC</i>    | mm           | 27          | 44             | 50            | 55.62          | 76.77       |
| <i>JUL.PREC</i>    | mm           | 60          | 66             | 67            | 68.3           | 84.69       |
| <i>AUG.PREC</i>    | mm           | 32.02       | 41             | 42.94         | 46             | 69.5        |
| <i>PREC.GC</i>     | mm           | 150.3       | 186.2          | 199.8         | 215            | 291.5       |
| <i>TEMP.GC</i>     | °C           | 18.1        | 18.94          | 19.2          | 19.48          | 20.02       |
| <i>TEMP.MIN.GC</i> | °C           | 12.48       | 13.65          | 13.95         | 14.23          | 14.8        |

#### RCP8.5 - 2080s -

|                    | <b>units</b> | <b>Min.</b> | <b>1st Qu.</b> | <b>Median</b> | <b>3rd Qu.</b> | <b>Max.</b> |
|--------------------|--------------|-------------|----------------|---------------|----------------|-------------|
| <i>MAY.PREC</i>    | mm           | 21          | 31.65          | 40            | 44.99          | 59.58       |
| <i>JUN.PREC</i>    | mm           | 24          | 39.55          | 44.87         | 49             | 68.77       |
| <i>JUL.PREC</i>    | mm           | 49          | 55.41          | 57            | 61             | 80.56       |
| <i>AUG.PREC</i>    | mm           | 36.69       | 45             | 47            | 49             | 73.5        |
| <i>PREC.GC</i>     | mm           | 139         | 174.8          | 186.9         | 201.8          | 282.3       |
| <i>TEMP.GC</i>     | °C           | 18.45       | 19.28          | 19.55         | 19.85          | 20.42       |
| <i>TEMP.MIN.GC</i> | °C           | 12.76       | 13.89          | 14.21         | 14.52          | 15.05       |
